# Supplementary figures and images for: A Prospective Trial: Handsfree Thermoregulated Bipolar Radiofrequency for Face and Neck Contouring
Source: PubMed Central journal article supplement — Plast Reconstr Surg Glob Open. 2022 Mar 28;10(3):e4194. doi: 10.1097/GOX.0000000000004194 (PMC9038493; doi:10.1097/gox.0000000000004194), 2022-03-28

**Baseline**

11/6/19 8:02 PM

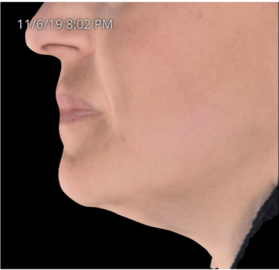

**1 MFU**

12/27/19 2:47 PM

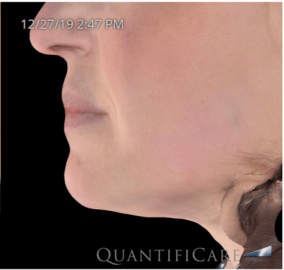

QUANTIFICARE

Supplement: gox-10-e4194-s001.pdf [file gox-10-e4194-s001.pdf]
